# Supplementary material for: Machine learning methods for stream water temperature prediction
Source: Copernicus journal article supplement (doi:10.5194/hess-2020-670), 2021-01-14
Supplement: Supplementary file [file hess-2020-670-RC1-supplement.pdf]

1 **Interactive comment on “Machine learning methods for stream water temperature**  
2 **prediction” by Feigl et al.**

3  
4 **Pr. Salim Heddam**

5 [heddamsalim@yahoo.fr](mailto:heddamsalim@yahoo.fr).

6 <https://orcid.org/0000-0002-8055-8463>

7  
8  
9 **General Comments**

10  
11 In the present study, the authors applied and compared six machines learning (ML)  
12 models for predicting river water temperature: XGBoost, FNN, RF, two deep learning models  
13 and the step-wise linear regression. Results obtained using the proposed ML were compared  
14 to those obtained using the air2stream and the linear regression (LR). The proposed models  
15 were developed and compared using data collected at ten Austria catchments. A standard  
16 modelling approach has been adopted for this study based on linking a set of input variables  
17 to one output variable. Mean, maximal and minimal air temperatures, precipitation and global  
18 solar radiation were selected as the most relevant regressors and used as input variables for  
19 predicting water temperature. Overall the paper is very interesting, well-structured, easy to  
20 ready, and written in a scientifically sound manner. Although modelling river water  
21 temperature is broadly discussed in the literature, and a large amount of work has been done  
22 in recent years, admittedly with some important conclusive answers, the present work has a  
23 large potential to expand significantly our knowledge in this subject. The approach proposed  
24 in the present work owes its originality from several points, including: (i) new introduced ML  
25 models belonging to different categories and having different modelling strategies, (ii) the use  
26 of different climatic variables as input instead of what is already done in the literature (i.e.,  
27 only air temperature and discharge), and (iii) the use of the Bayesian optimization method  
28 (BO) is innovative and the authors have developed a detail proposal. The most important  
29 finding of the present study is that the ML models were more accurate than the air2stream and  
30 the LR models, and the BO can help in improving significantly the models accuracies. In  
31 addition, the performances of the ML models varied from one catchment to another and in  
32 overall, worked equally with slightly difference. I have a number of concerns related to the  
33 paper, to my opinion needs to be clarified by the authors.

34  
35 **Major’s Comments**

- 36  
37 1. The comparisons of models results with in situ measured data using only errors metrics is  
38 insufficient and does not help in providing robust conclusions regarding models  
39 accuracies, robustness and fitting capabilities. Specifically, using several kinds of  
40 goodness-of-fit indicators should be more useful: the coefficient of determination ( $R^2$ ), the  
41 Nash-Sutcliffe efficiency (NSE), and the index of agreement  $d$ , are highly recommended  
42 for hydrological models evaluation ([Legates and McCabe 1999](#); [Moriasi et al. 2007](#);  
43 [Harmel and Smith 2007](#); [Gupta 1998, 2008](#); [Krause et al. 2005](#)).
- 44 2. Models structures need to be clarified. In Lines 173-175, the authors argued that including  
45 the lag of all variables for 4 previous days can help in improving models accuracies  
46 according to [Webb et al. \(2003\)](#). First, using only 4 previous lag should be justified, on  
47 which basis it was selected (i.e., cross-correlation analysis can be helpful for answering  
48 this question)? Second, according to [Webb et al. \(2003\)](#), adopting the previous lag as input  
49 variables can be useful on only hourly data scenario. Therefore, a comparison between  
50 models with and without lag data may be a good option.

## 51 Specific Comments

- 52
- 53 1. The introduction is not deeply written and in some cases need improvement. Specifically,  
54 the proposed ML reported in the literature should be presented, discussed, and the strength  
55 and weakness of each one would be more useful and effective if they are highlighted.  
56 Using lumped references do not help in understanding the mains contribution of the work.
  - 57 2. Research gap. What are the mains contributions of the present study in comparison to  
58 what is already done? What does it add to existing literature?
  - 59 3. Lines 47 to 50, from Austria to characteristics. To our opinion this paragraph is more  
60 suitable to be moved to section 2.1.
  - 61 4. Line 79: ‘‘To the author’s knowledge, RF has not been applied for river water  
62 temperature prediction yet’’. This statement is incorrect. The RF was recently reported as  
63 a powerful tool for predicting river water temperature (Heddam et al. 2020).
  - 64 5. Models comparison using cross-station scenarios can help in providing more conclusions,  
65 and a clear idea about models capabilities outside of their own catchment area: models  
66 calibration using data from on station and validated for other stations (i.e., see Zhu and  
67 Heddam 2019).
- 68

## 69 References

70 Gupta, H.V., Sorooshian, S., Yapo, P.O., (1998). Toward improved calibration of  
71 hydrological models: multiple and non-commensurable measures of information. *Water*  
72 *Resour. Res.* 34, 751-763.

73

74 Gupta, H.V., Wagener, T., Liu, Y., (2008). Reconciling theory with observations: elements of  
75 a diagnostic approach to model evaluation. *Hydrol. Proc.* 22, 3802-3813.

76

77 Harmel, R.D., & Smith, P.K. (2007). Consideration of measurement uncertainty in the  
78 evaluation of goodness-of-fit in hydrologic and water quality modeling. *Journal of*  
79 *Hydrology*, 337(3-4), 326-336.

80

81 Heddam, S., Ptak, M., & Zhu, S. (2020). Modelling of daily lake surface water temperature  
82 from air temperature: Extremely randomized trees (ERT) versus Air2Water, MARS, M5Tree,  
83 RF and MLPNN. *Journal of Hydrology*, 588, 125130.

84

85 Krause, P., Boyle, D., Bse, F., (2005). Comparison of different efficiency criteria for  
86 hydrological model assessment. *Adv. Geosci.* 5, 89-97.

87

88 Legates, D.R., & McCabe Jr, G.J. (1999). Evaluating the use of ‘‘goodness-of-fit’’ measures in  
89 hydrologic and hydroclimatic model validation. *Water resources research*, 35(1), 233-241.

90

91 Moriasi, D.N., Arnold, J.G., Van Liew, M.W., Bingner, R.L., Harmel, R.D., & Veith, T.L.  
92 (2007). Model evaluation guidelines for systematic quantification of accuracy in watershed  
93 simulations. *Transactions of the ASABE*, 50(3), 885-900.

94

95 Webb, B.W., Clack, P.D., Walling, D.E. (2003). Water-air temperature relationships in a  
96 Devon river system and the role of flow, *Hydrological Processes*, 17, 3069-3084.

97

98 Zhu, S., & Heddam, S. (2019). Modelling of maximum daily water temperature for streams:  
99 Optimally pruned extreme learning machine (OPELM) versus radial basis function neural  
100 networks (RBFNN). *Environmental Processes*, 6(3), 789-804.
